# Supplementary material
Source: PubMed Central journal article supplement (PMC2692842)
Supplement: NIHMS78449-supplement-Table_S1.pdf [file NIHMS78449-supplement-Table_S1.pdf]

**Table S1. Kinetic analysis of DA progenitor proliferation**

|        |       |         | Average % of BrdU-labeled DA neurons | Standard error | Number of embryos |
|--------|-------|---------|--------------------------------------|----------------|-------------------|
| 4 hpf  | WT    | Gr. 2   | 100                                  | 0              | 6                 |
|        |       | Gr. 3-6 | 92.8                                 | 5.3            | 6                 |
|        | +Dkk1 | Gr. 2   | 91.8                                 | 5.6            | 4                 |
|        |       | Gr. 3-6 | 86.4                                 | 6              | 4                 |
| 6 hpf  | WT    | Gr. 2   | 100                                  | 0              | 3                 |
|        |       | Gr. 3-6 | 93.3                                 | 8.1            | 3                 |
|        | +Dkk1 | Gr. 2   | 91.6                                 | 11.7           | 2                 |
|        |       | Gr. 3-6 | 100                                  | 0              | 2                 |
| 8 hpf  | WT    | Gr. 2   | 96.8                                 | 3.3            | 8                 |
|        |       | Gr. 3-6 | 92.3                                 | 3.1            | 8                 |
|        | +Dkk1 | Gr. 2   | 86.6                                 | 6.9            | 5                 |
|        |       | Gr. 3-6 | 94.4                                 | 3.9            | 5                 |
| 10 hpf | WT    | Gr. 2   | 72.2                                 | 18             | 3                 |
|        |       | Gr. 3-6 | 88.4                                 | 0.5            | 3                 |
|        | +Dkk1 | Gr. 2   | 69.4                                 | 23.8           | 3                 |
|        |       | Gr. 3-6 | 83.3                                 | 20.4           | 3                 |
| 12 hpf | WT    | Gr. 2   | 34.4                                 | 9.5            | 6                 |
|        |       | Gr. 3-6 | 72.2                                 | 13.8           | 6                 |
|        | +Dkk1 | Gr. 2   | 39.3                                 | 8.9            | 6                 |
|        |       | Gr. 3-6 | 64.5                                 | 10.5           | 6                 |
| 16 hpf | WT    | Gr. 2   | 0                                    | 0              | 6                 |
|        |       | Gr. 3-6 | 0                                    | 0              | 6                 |
|        | +Dkk1 | Gr. 2   | 0                                    | 0              | 6                 |
|        |       | Gr. 3-6 | 4.5                                  | 2.3            | 6                 |
